# Supplementary material
Source: Springer Nature journal article supplement (https://www.springermedizin.de/resource/supplementary/13046_2011_533_MOESM2_ESM.pdf/9662210)

CDK8

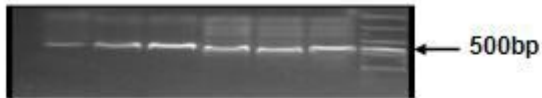

$\beta$ -catenin

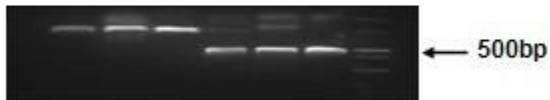

A B C D E F marker

Supplement: MOESM2 [file 9662210]
